# Supplementary material for: A novel one-pot three component synthesis of N-(phenylimino)indazole-1-carbothioamides
Source: Royal Society of Chemistry journal article supplement (doi:10.1039/c3ra44064h), 2013-11-26

## Supporting information

# **A Novel One-Pot Three-Component Synthesis of *N*-(phenylimino)indazole-1-carbothioamides**

Shirin Safaei, Iraj Mohammadpoor-Baltork,\* Ahmad Reza Khosropour,\* Majid Moghadam,  
Shahram Tangestaninejad, Valiollah Mirkhani

*Catalysis Division, Department of Chemistry, University of Isfahan, Isfahan 81746-73441, Iran*  
E-mails: [imbaltork@sci.ui.ac.ir](mailto:imbaltork@sci.ui.ac.ir)

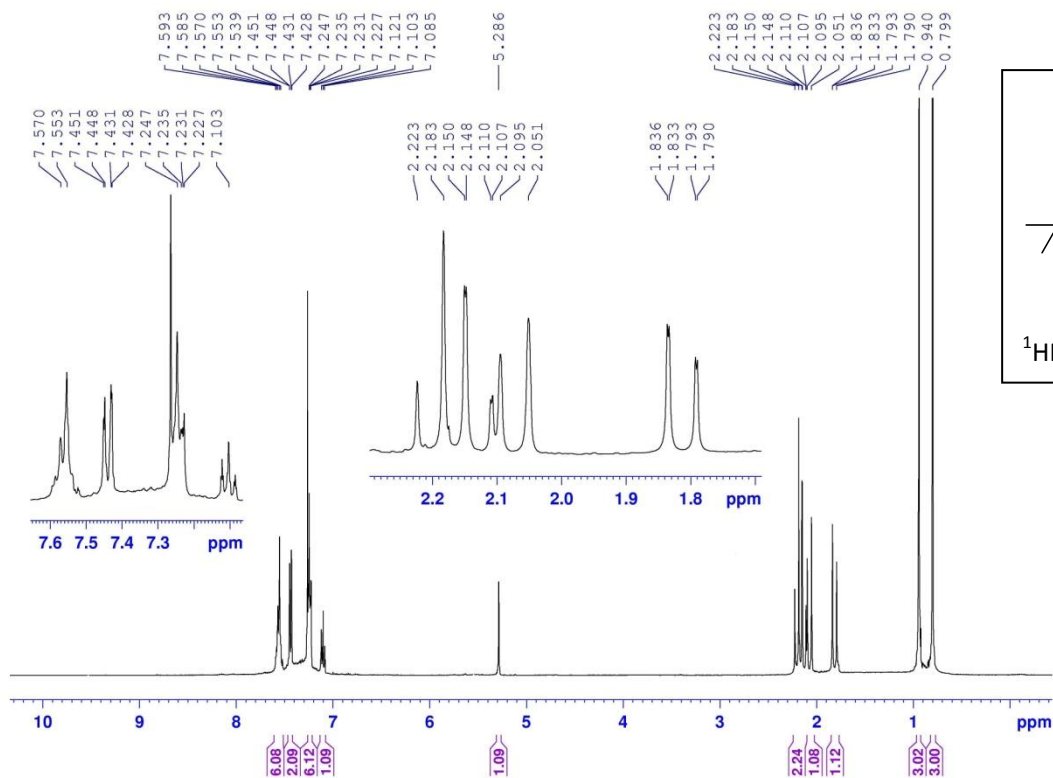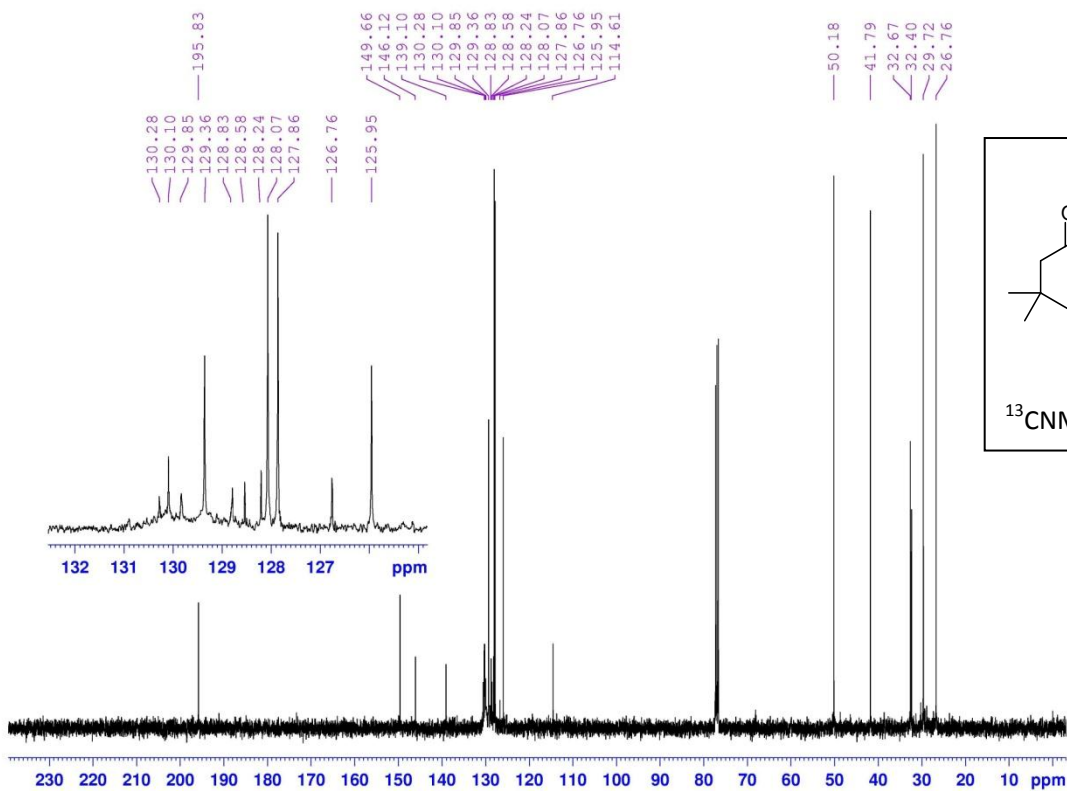

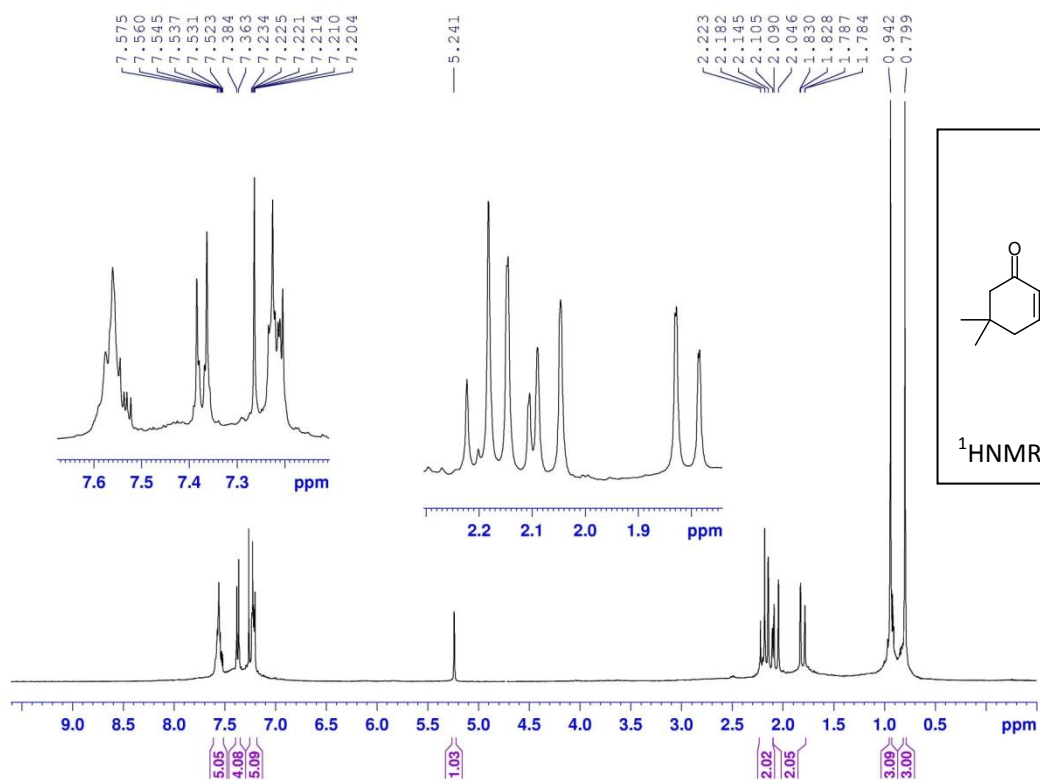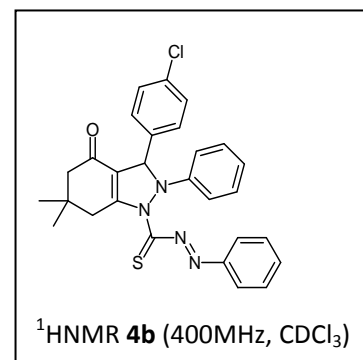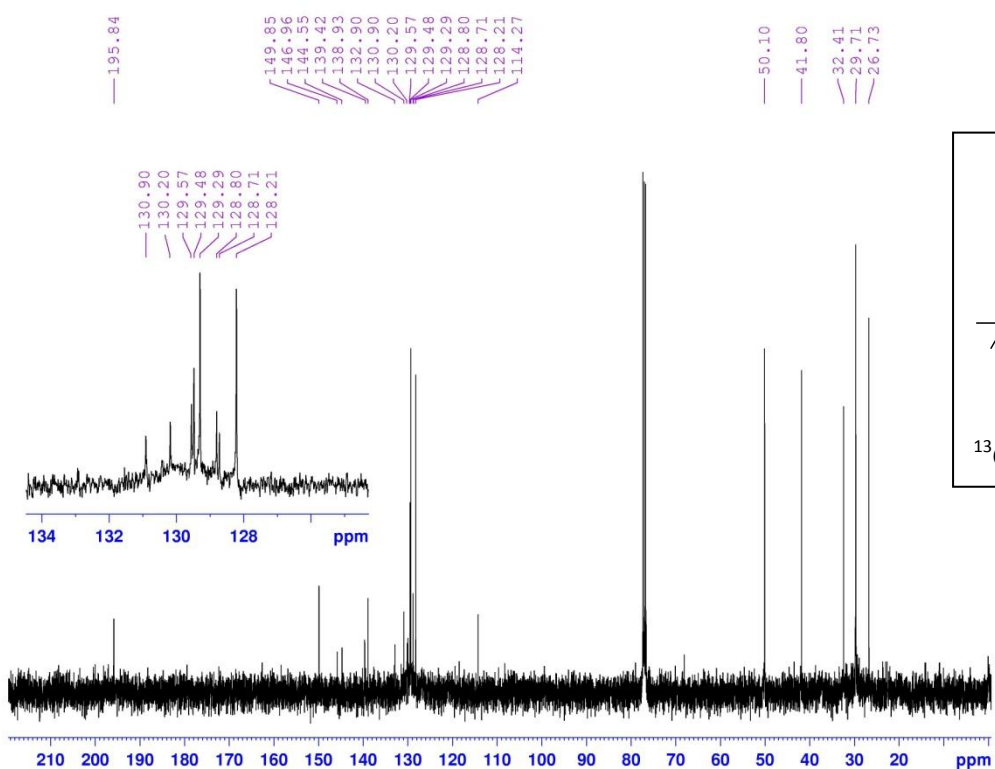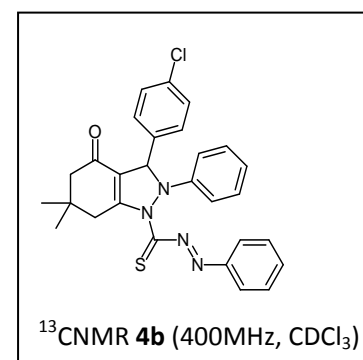

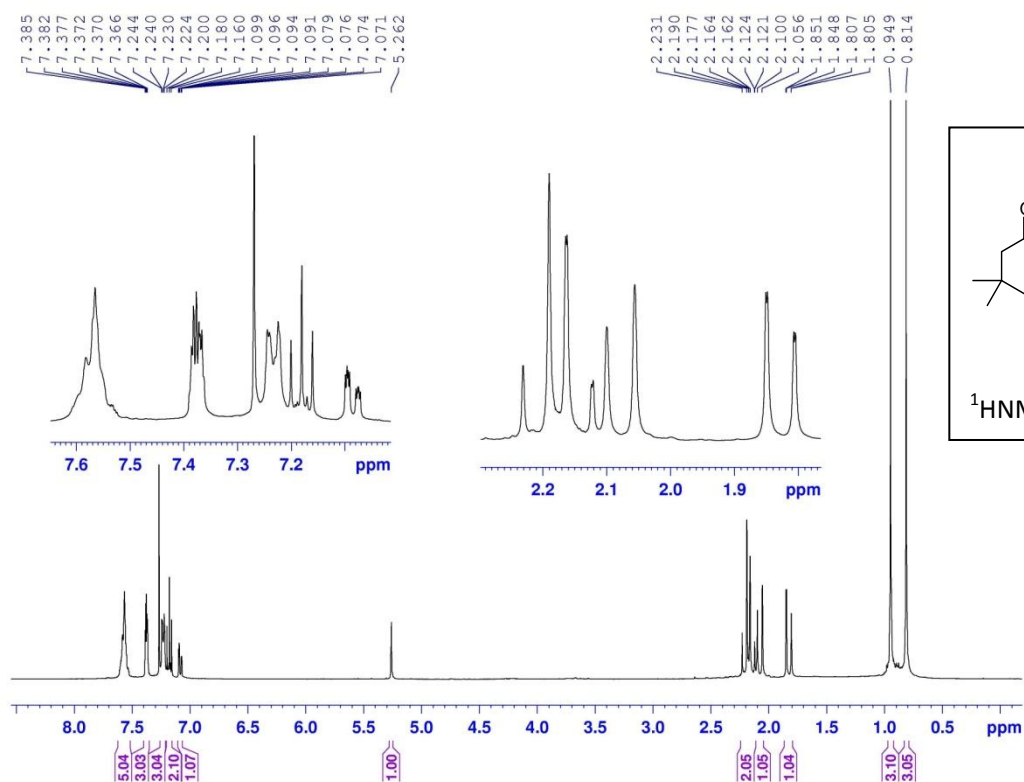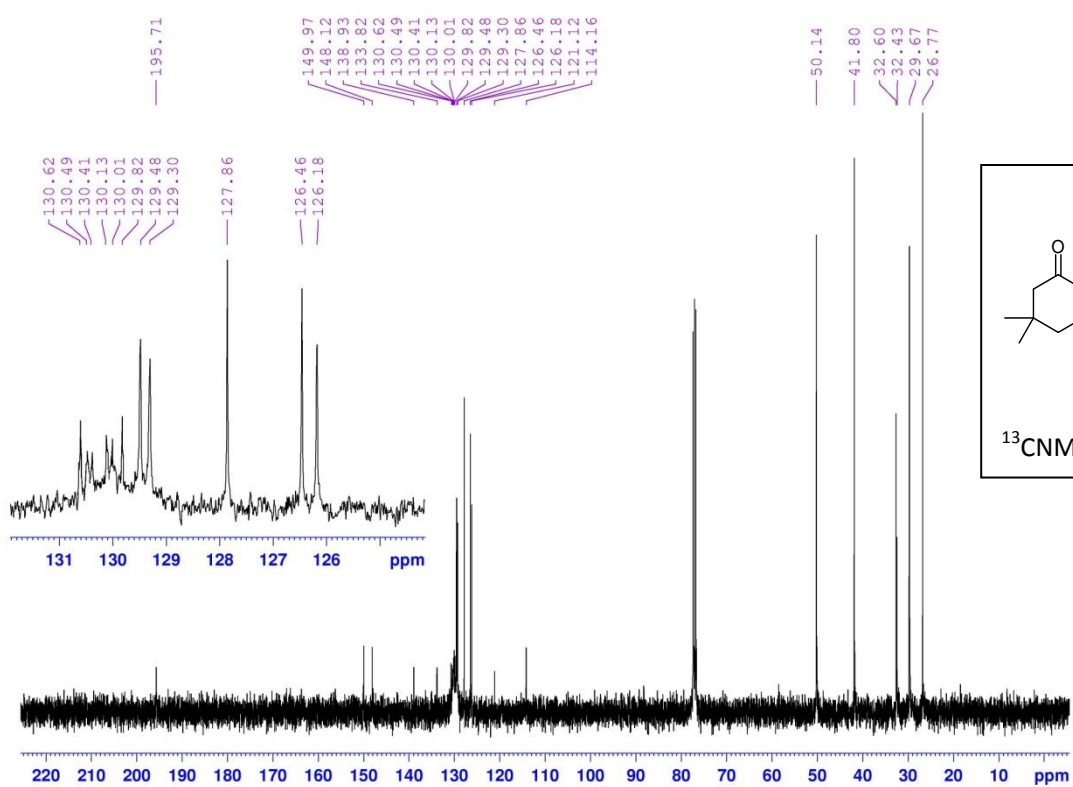



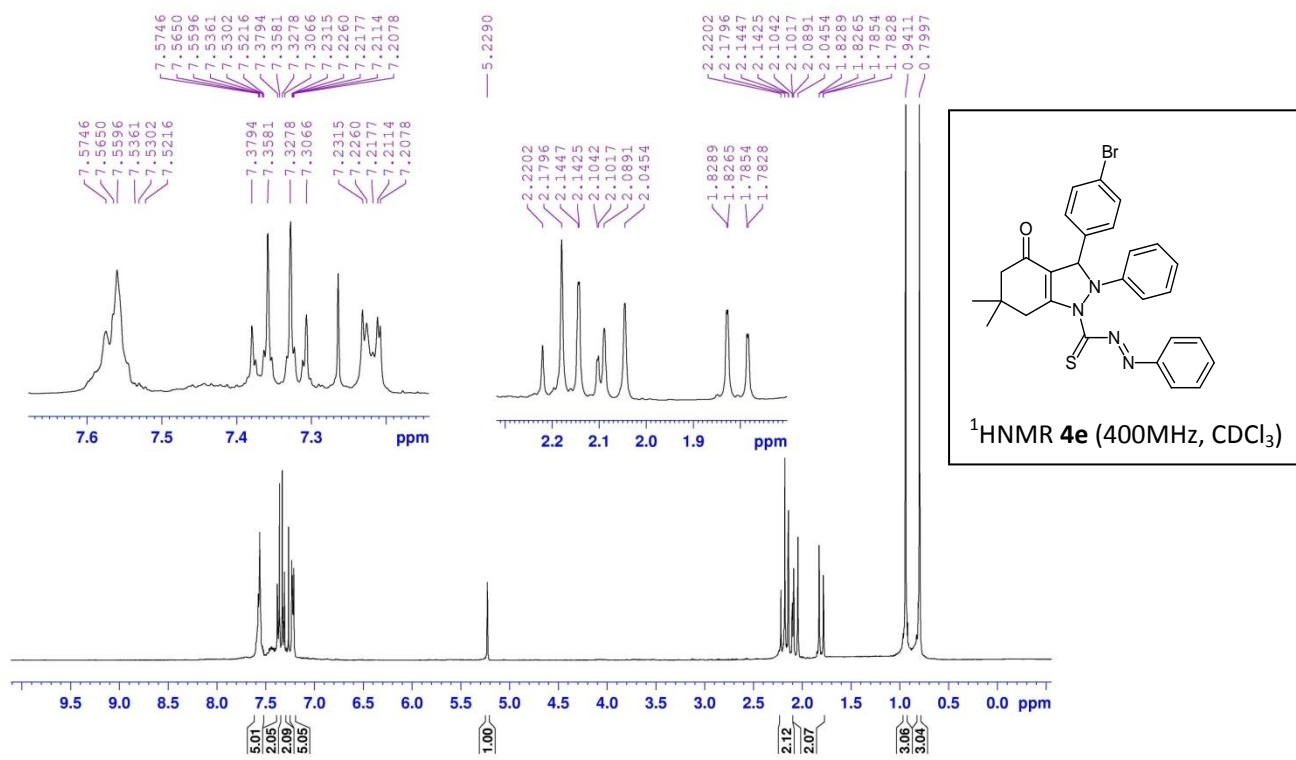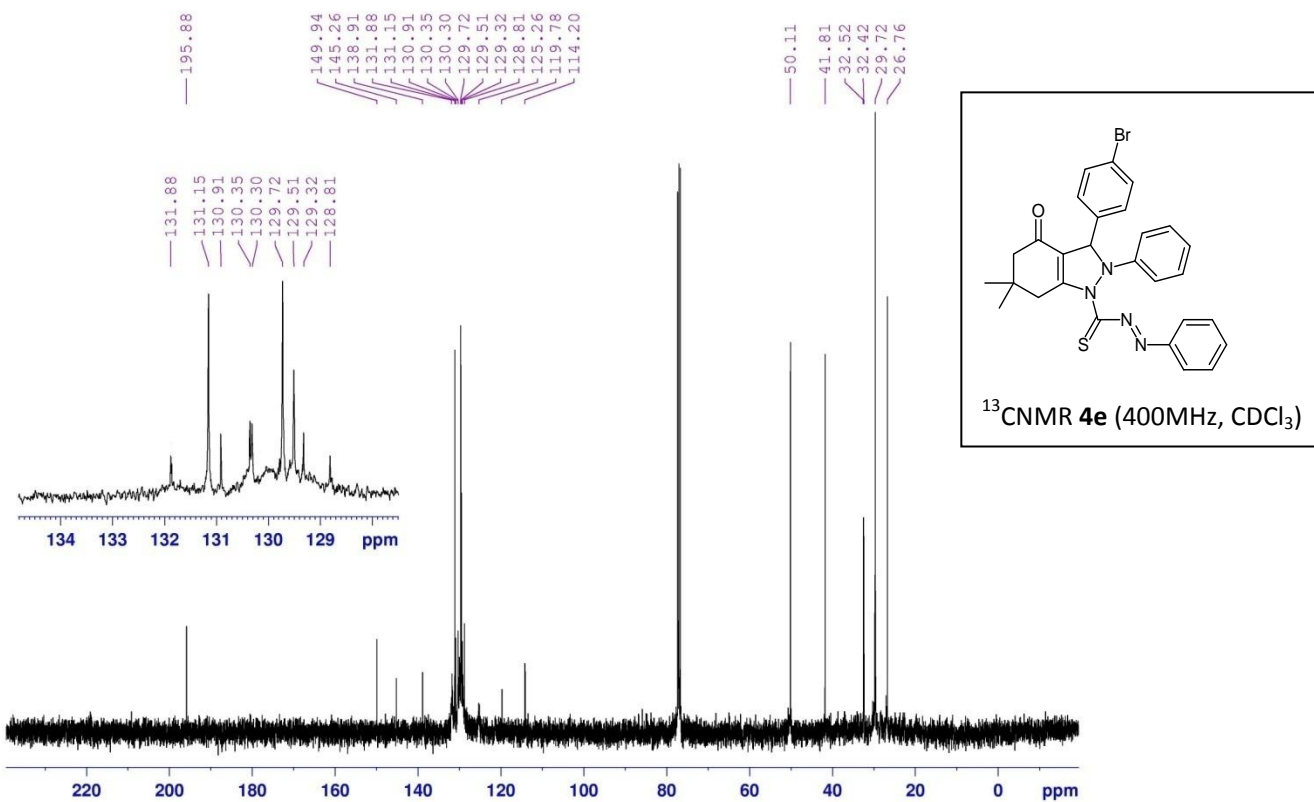

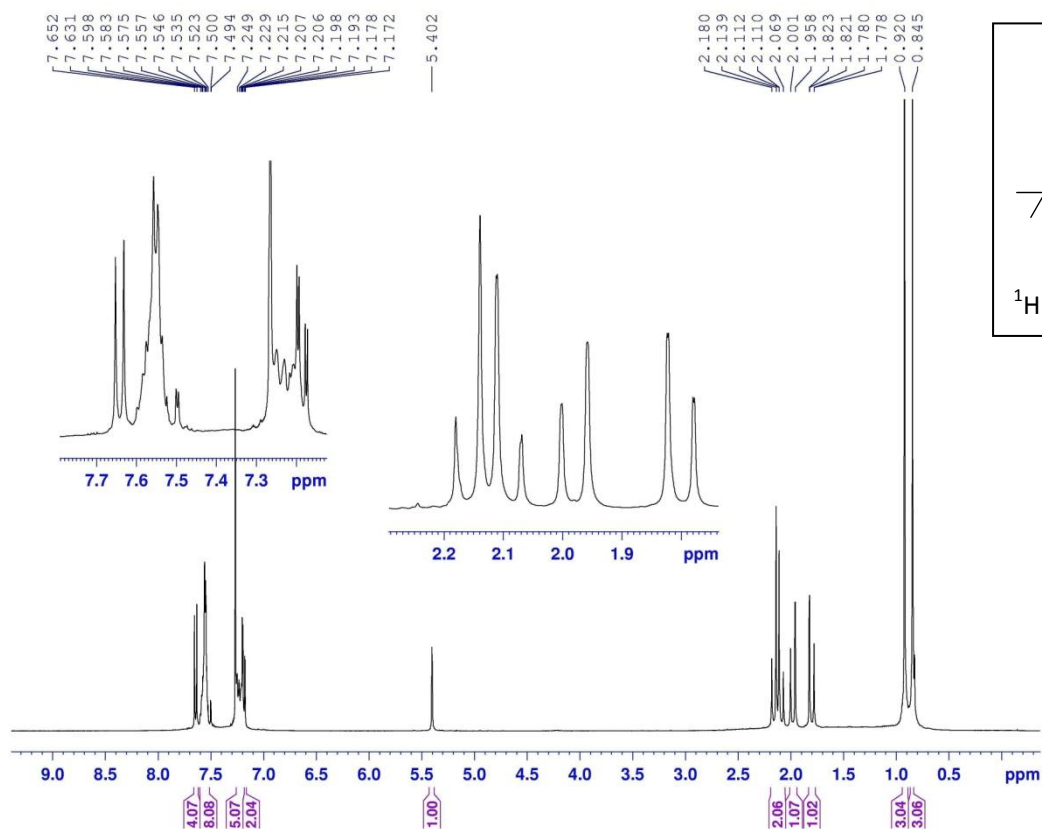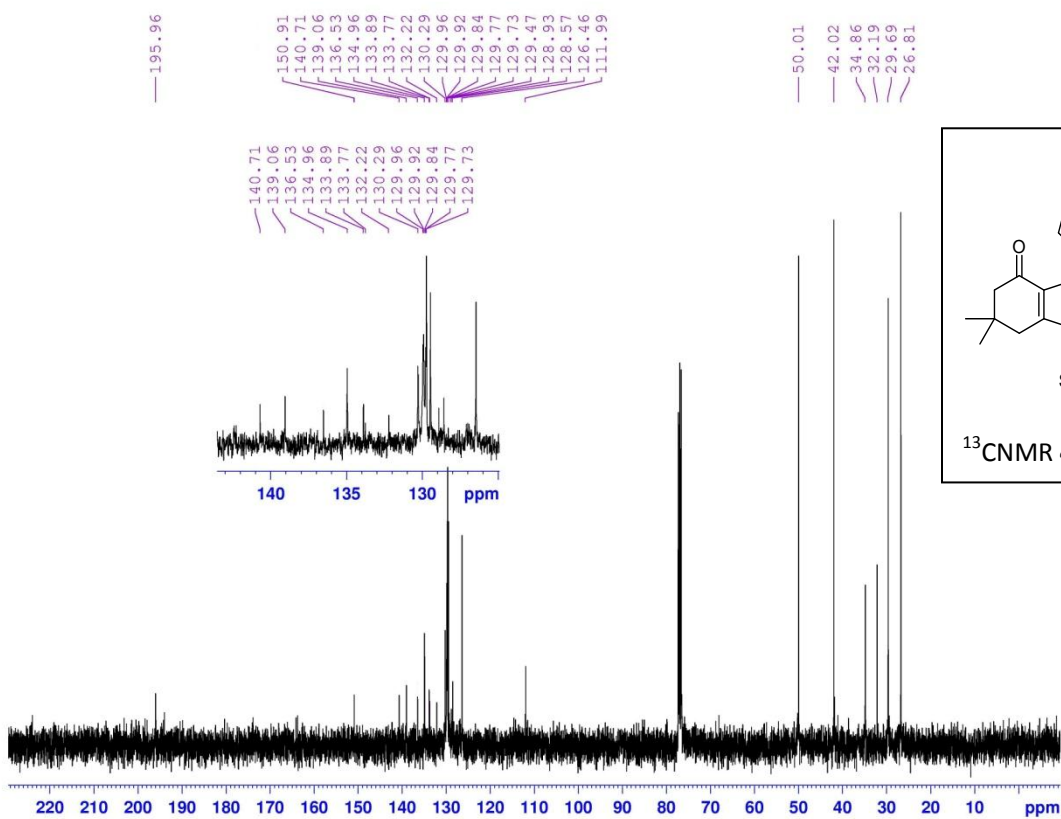

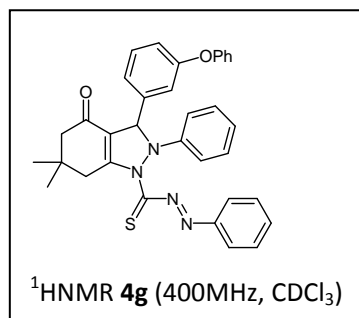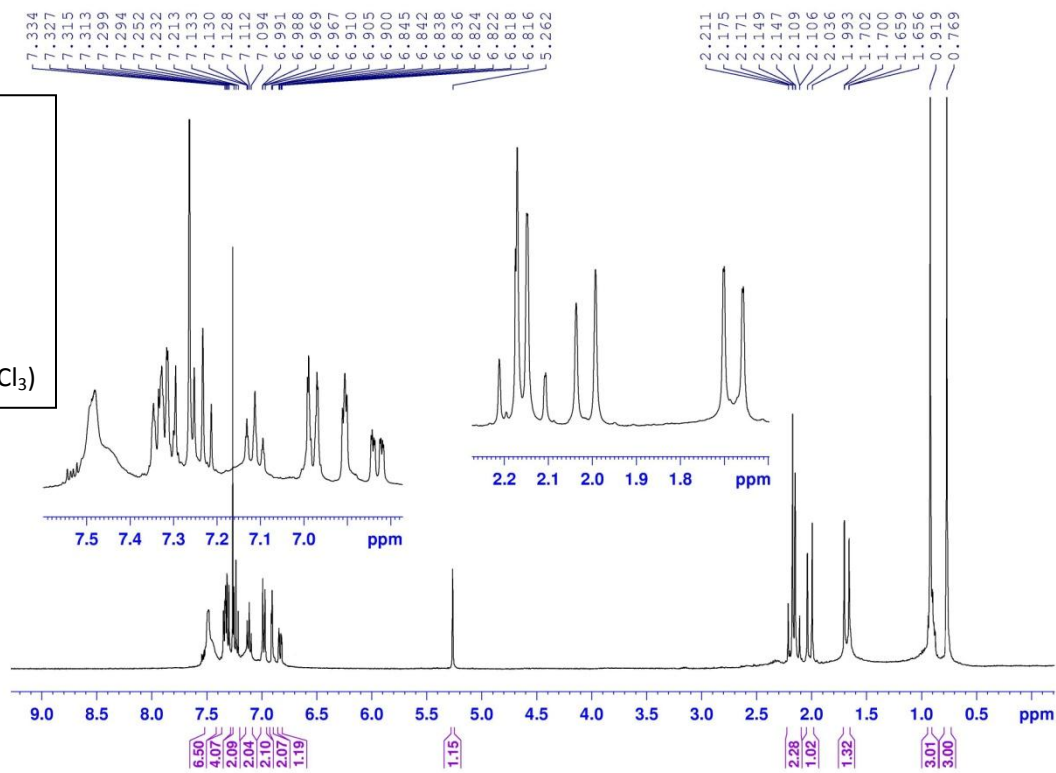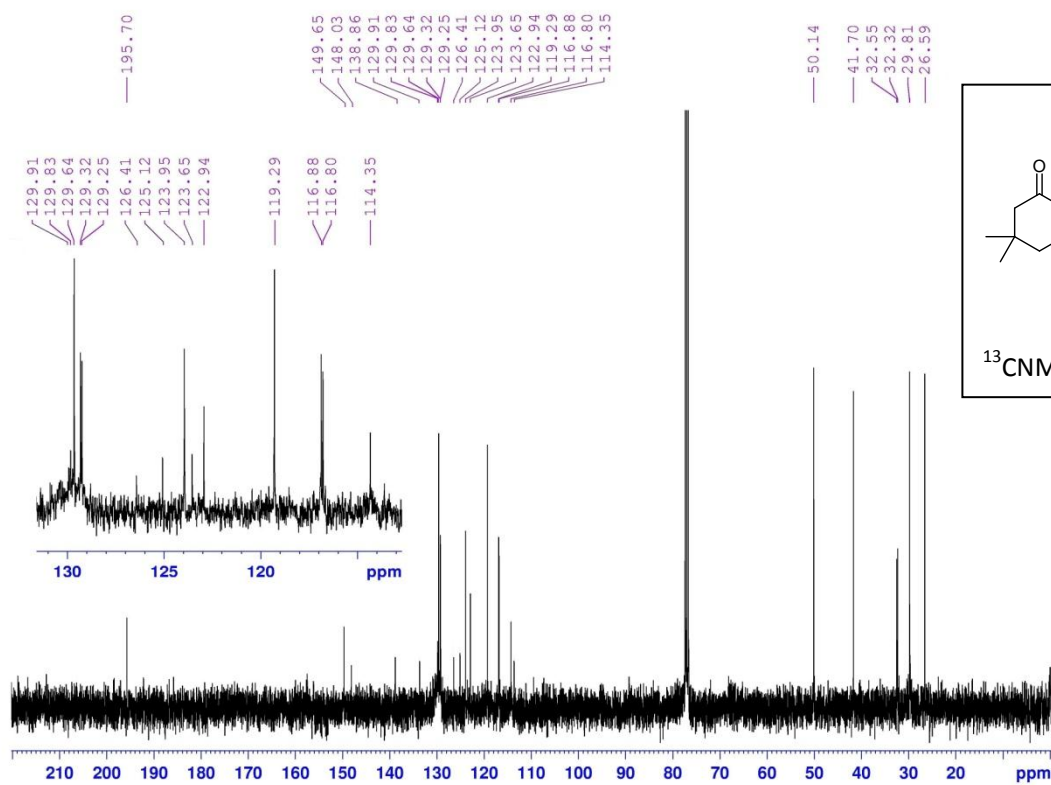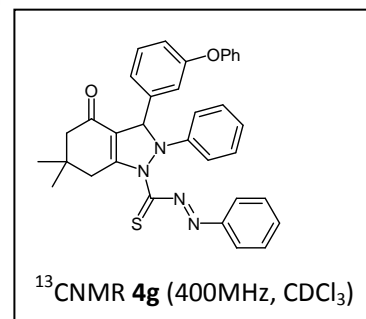



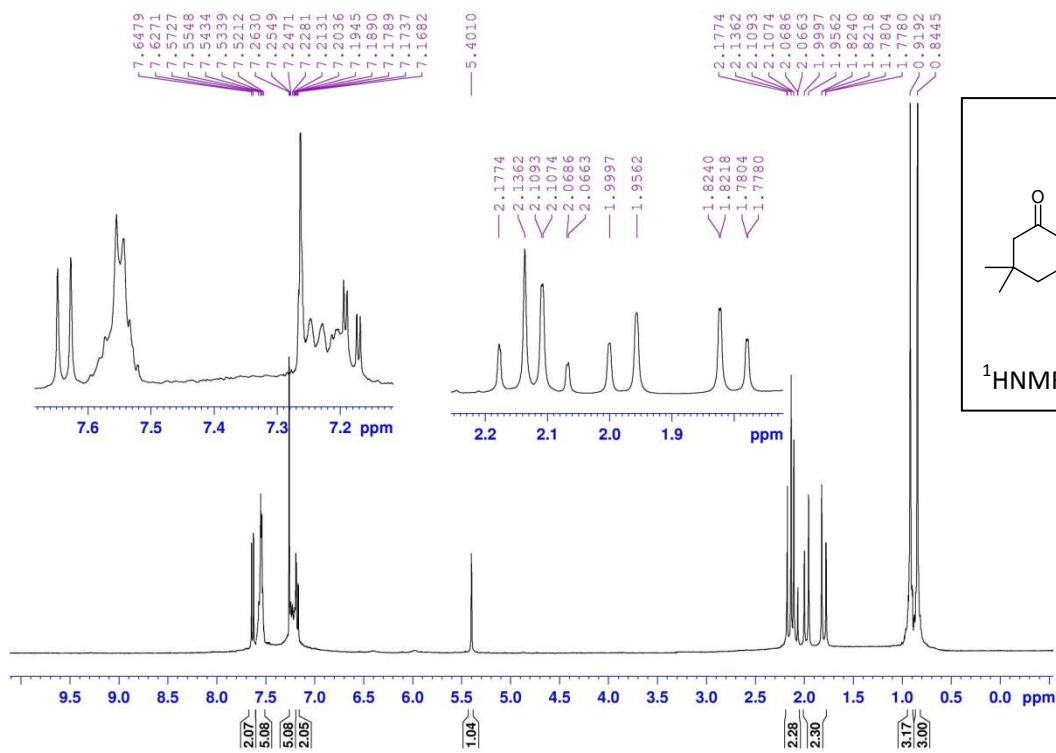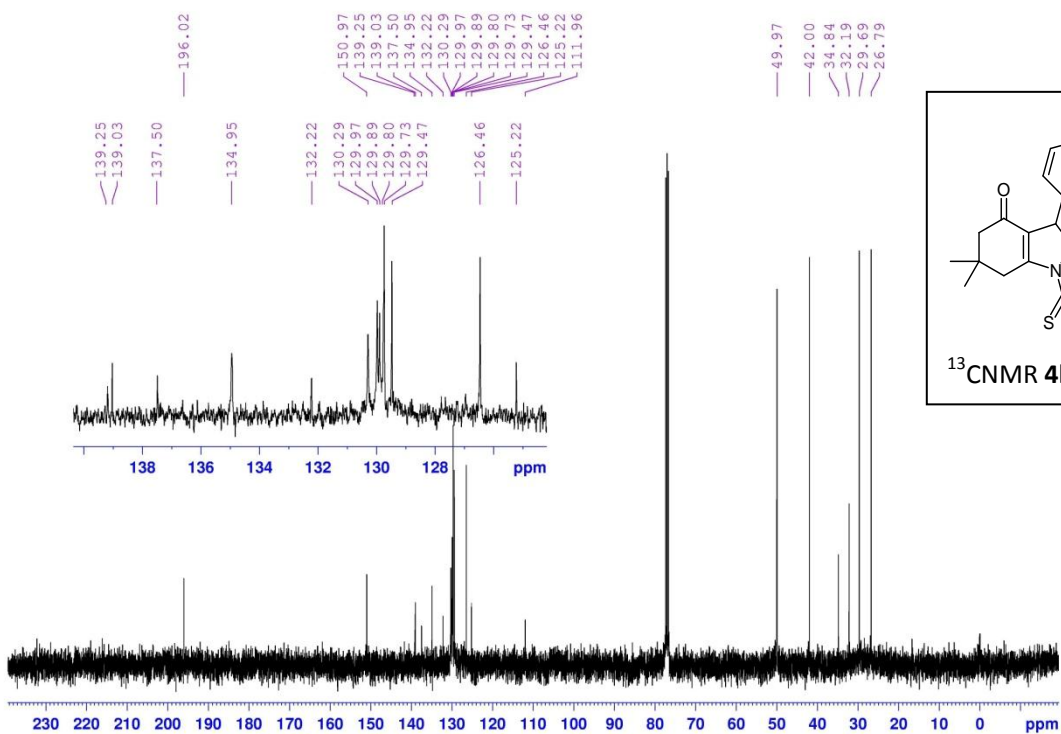

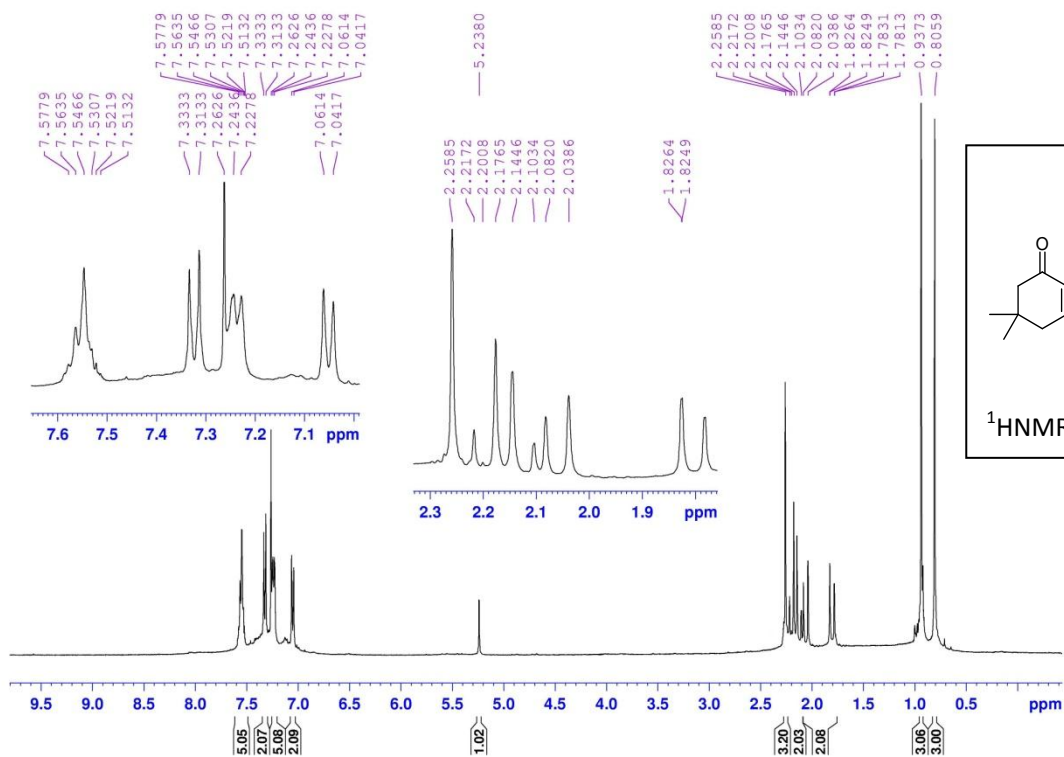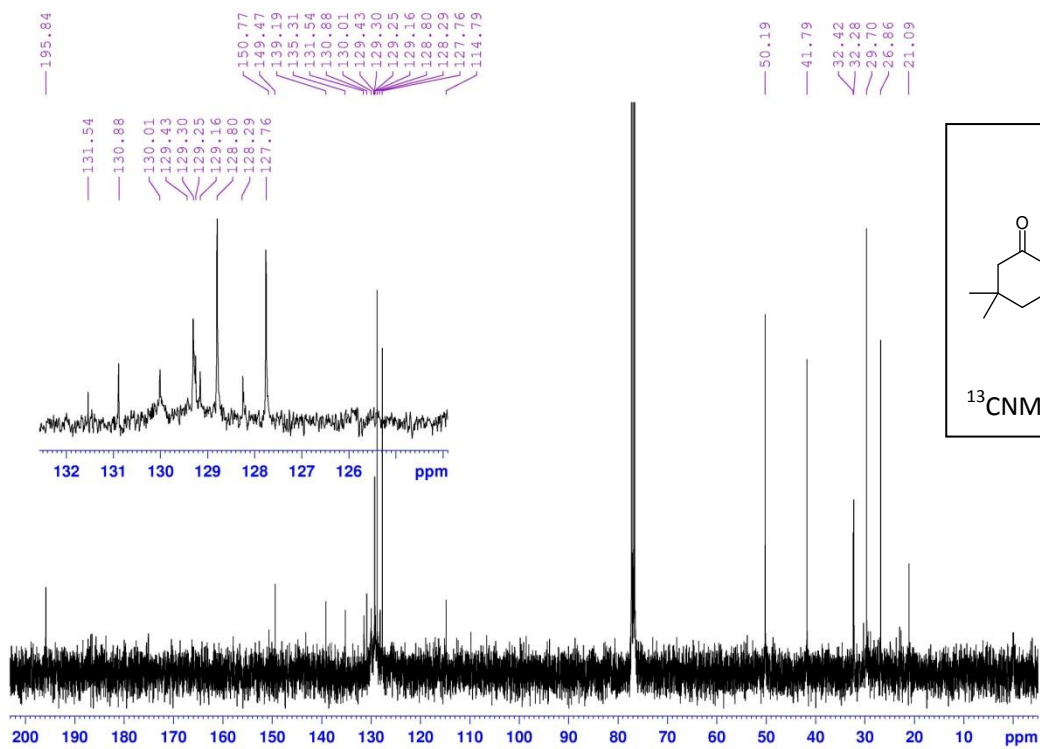

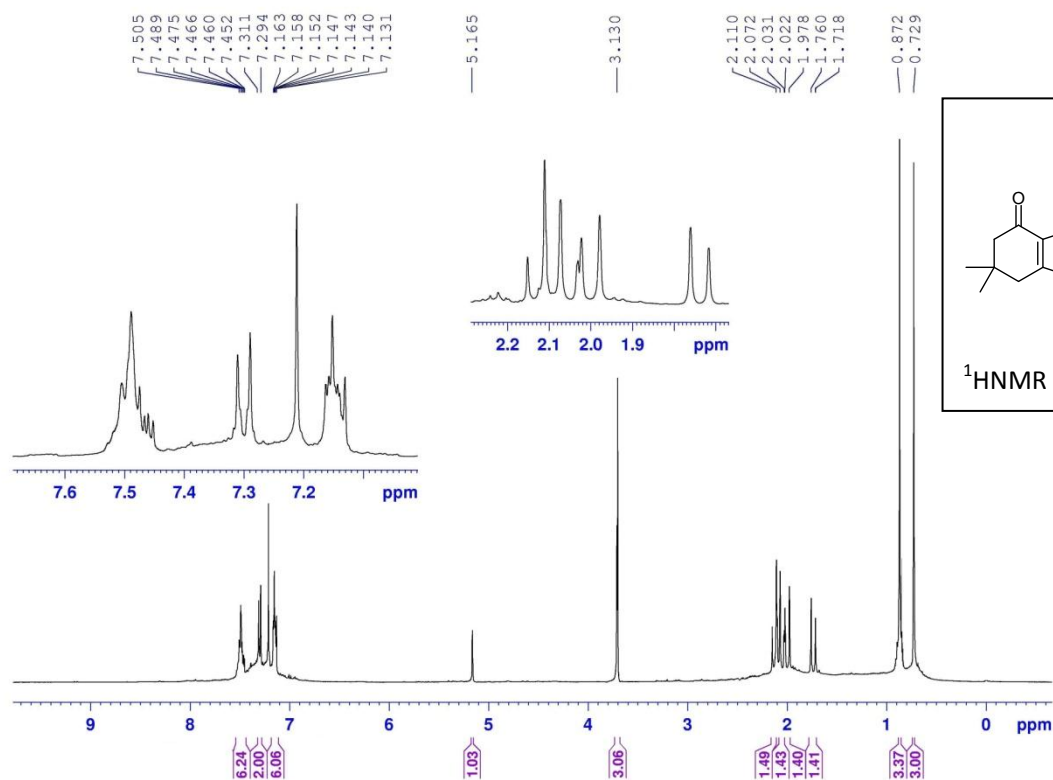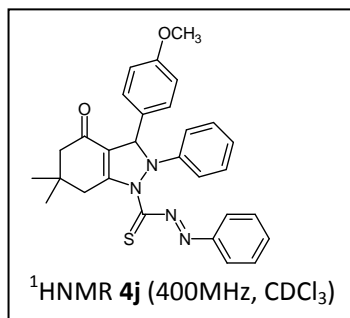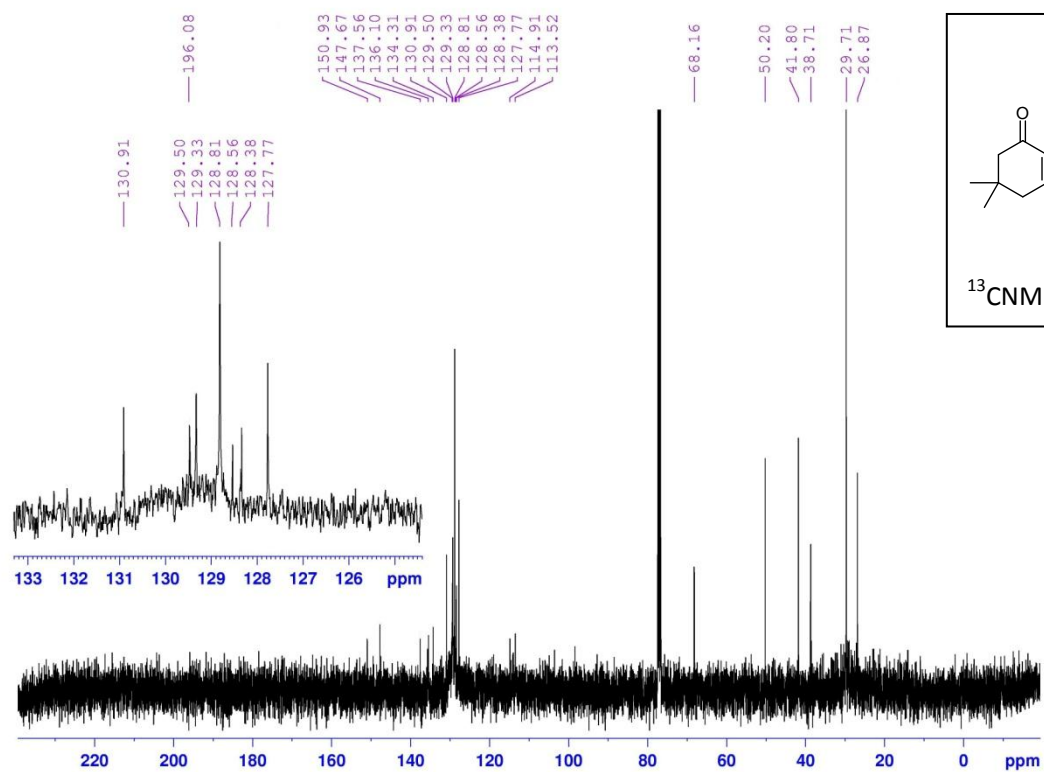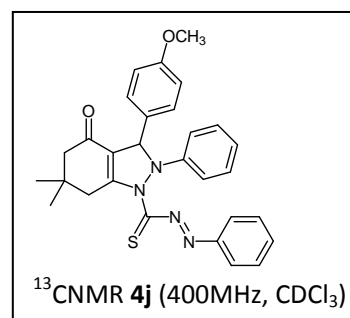

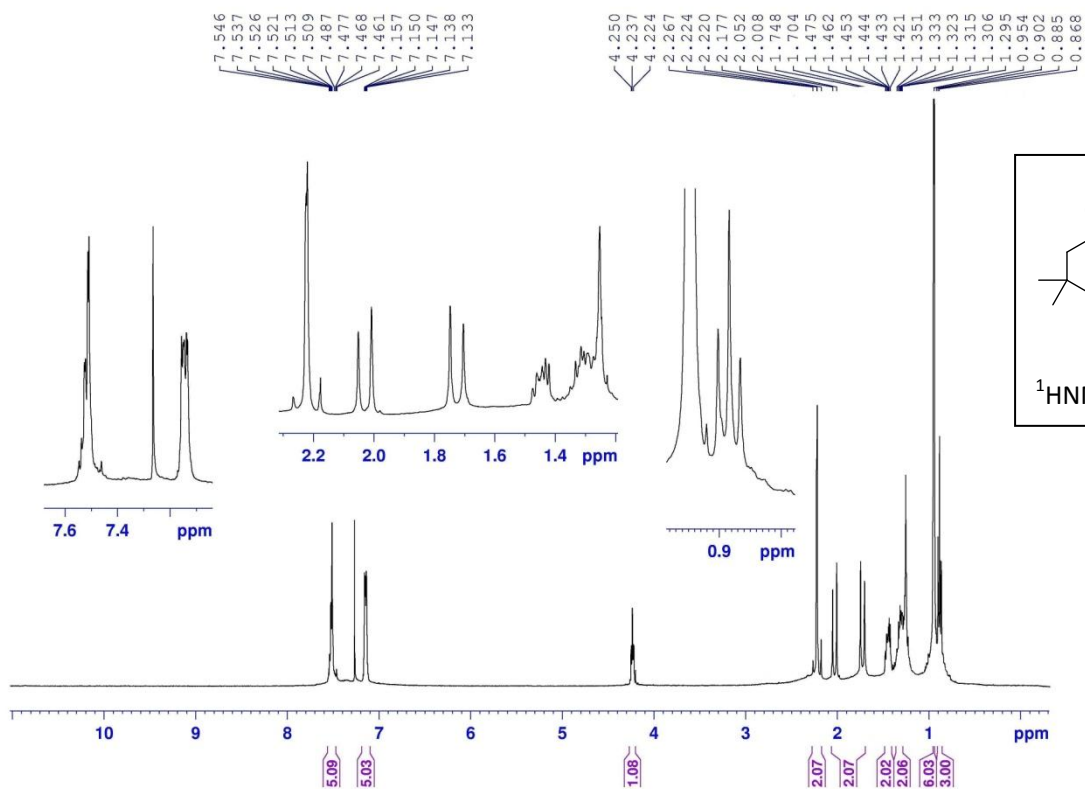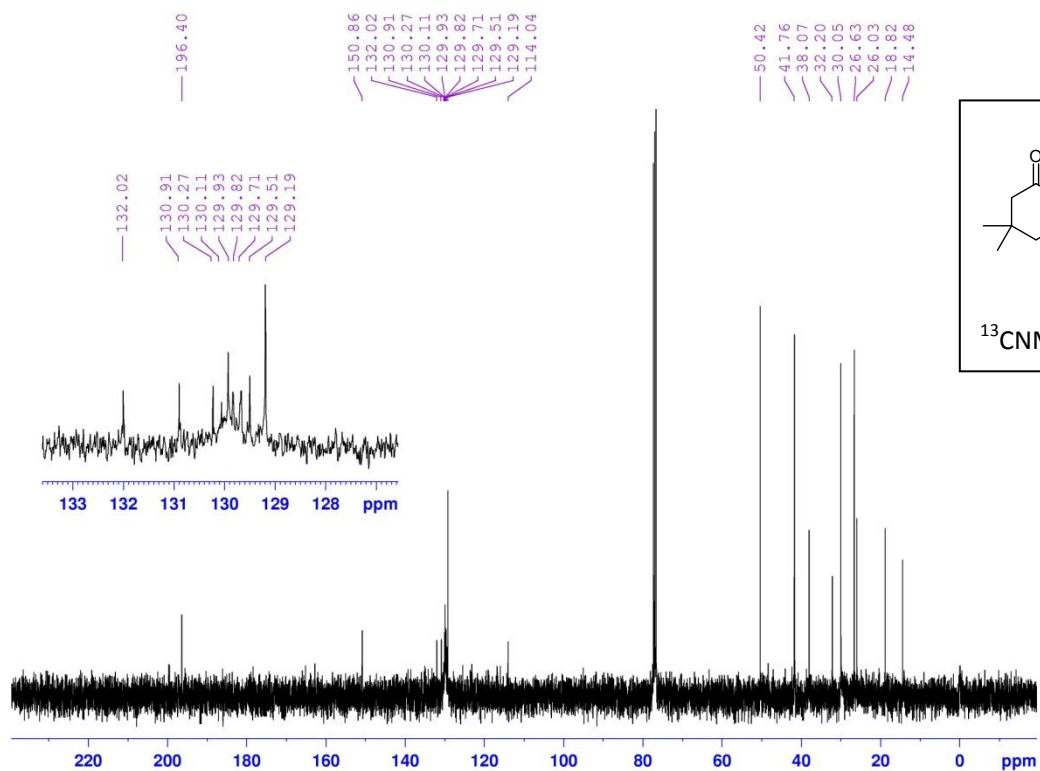

Supplement: c3ra44064h.pdf [file c3ra44064h.pdf]
